# Supplementary material
Source: ML conference proceedings conference paper supplement (https://openreview.net/forum?id=K4Su8BIivap)
Supplement: supplementary_material [file attachment]

---

# Learning Barrier Certificates: Towards Safe Reinforcement Learning with Zero Training-time Violations

---

Anonymous Author(s)

Affiliation

Address

email

## Abstract

1 Training-time safety violations have been a major concern when we deploy rein-  
2 forcement learning algorithms in the real world. This paper explores the possibility  
3 of safe RL algorithms with zero training-time safety violations in the challenging  
4 setting where we are only given a safe but trivial-reward initial policy without  
5 any prior knowledge of the dynamics and additional offline data. We propose an  
6 algorithm, **Co-trained Barrier Certificate for Safe RL (CRABS)**, which iteratively  
7 *learns* barrier certificates, dynamics models, and policies. The barrier certificates  
8 are learned via adversarial training and ensure the policy’s safety assuming cali-  
9 brated learned dynamics. We also add a regularization term to encourage larger  
10 certified regions to enable better exploration. Empirical simulations show that zero  
11 safety violations are already challenging for a suite of simple environments with  
12 only 2-4 dimensional state space, especially if high-reward policies have to visit  
13 regions near the safety boundary. Prior methods require hundreds of violations to  
14 achieve decent rewards on these tasks, whereas our proposed algorithms incur zero  
15 violations.

## 1 Introduction

17 Researchers have demonstrated that reinforcement learning (RL) can solve complex tasks such as  
18 Atari games [Mnih et al., 2015], Go [Silver et al., 2017], dexterous manipulation tasks [Akkaya et al.,  
19 2019], and many more robotics tasks in simulated environments [Haarnoja et al., 2018]. However,  
20 deploying RL algorithms to real-world problems still faces the hurdle that they require many unsafe  
21 environment interactions. For example, a robot’s unsafe environment interactions include falling  
22 and hitting other objects, which incur physical damage costly to repair. Many recent deep RL  
23 works reduce the number of environment interactions significantly (e.g., see Haarnoja et al. [2018],  
24 Fujimoto et al. [2018], Janner et al. [2019], Dong et al. [2020], Luo et al. [2019], Chua et al. [2018]  
25 and reference therein), but the number of unsafe interactions is still prohibitive for safety-critical  
26 applications such as robotics, medicine, or autonomous vehicles [Berkenkamp et al., 2017].

27 Reducing the number of safety violations may not be sufficient for these safety-critical applications—  
28 we may have to eliminate them. This paper explores the possibility of safe RL algorithms with *zero*  
29 *safety violations* in both training time and test time. We also consider the challenging setting where  
30 we are only given a safe but trivial-reward initial policy.

31 A recent line of works on safe RL design novel actor-critic based algorithms under the constrained  
32 policy optimization formulation [Thananjeyan et al., 2021, Srinivasan et al., 2020, Bharadhwaj et al.,  
33 2020, Yang et al., 2020, Stooke et al., 2020]. They significantly reduce the number of training-time  
34 safety violations. However, these algorithms fundamentally learn the safety constraints by contrasting

the safe and unsafe trajectories. In other words, because the safety set is only specified through the safety costs that are observed *postmortem*, the algorithms only learn the concept of safety through seeing unsafe trajectories. Therefore, these algorithms cannot achieve zero training-time violations. For example, even for the simple 2D inverted pendulum environment, these methods still require at least 80 unsafe trajectories (see Figure 2 in Section 6).

Another line of work utilizes ideas from control theory and model-based approach [Cheng et al., 2019, Berkenkamp et al., 2017, Taylor et al., 2019, Zeng et al., 2020]. These works propose sufficient conditions involving certain Lyapunov functions or control barrier functions that can certify the safety of a subset of states or policies [Cheng et al., 2019]. These conditions assume access to calibrated dynamical models. They can, in principle, permit safety guarantees without visiting any unsafe states because, with the calibrated dynamics, we can foresee future danger. However, control barrier functions are often non-trivially *handcrafted* with prior knowledge of the environments [Ames et al., 2019, Nguyen and Sreenath, 2016].

This work aims to design model-based safe RL algorithms that achieve zero training-time safety violations by *learning* the barrier certificates *iteratively*. We present the algorithm **Co-trained Barrier Certificate for Safe RL (CRABS)**, which alternates between *learning* barrier certificates that certify the safety of *larger* regions of states, optimizing the policy, collecting more data within the certified states, and refining the learned dynamics with data.

The work of Richards et al. [2018] is a closely related prior result, which learns a Lyapunov function given a fixed dynamics model via discretization of the state space. Our work significantly extends it with three algorithmic innovations. First, we use adversarial training to learn the certificates, which avoids discretizing state space and can potentially work with higher dimensional state space than the two-dimensional problems in Richards et al. [2018]. Second, we do not assume a given, globally accurate dynamics; instead, we learn the dynamics from safe explorations. We achieve this by co-learning the certificates, dynamics, and policy to iteratively grow the certified region and improve the dynamics and still maintain zero violations. Thirdly, the work Richards et al. [2018] only certifies the safety of some states and does not involve learning a policy. In contrast, our work learns a policy and tailors the certificates to the learned policies. In particular, our certificates aim to certify only states near the trajectories of the current and past policies—this allows us to not waste the expressive power of the certificate parameterization on irrelevant low-reward states.

We evaluate our algorithms on a suite of tasks, including a few where achieving high rewards requires careful exploration near the safety boundary. For example, in the *Swing* environment, the goal is to swing a rod with the largest possible angle under the safety constraints that the angle is less than  $90^\circ$ . We show that our method reduces the number of safety violations from several hundred to zero on these tasks.

## 2 Setup and Preliminaries

### 2.1 Problem Setup

We consider the standard RL setup with an infinite-horizon *deterministic* Markov decision process (MDP). An MDP is specified by a tuple  $(\mathcal{S}, \mathcal{A}, \gamma, r, \mu, T)$ , where  $\mathcal{S}$  is the state space,  $\mathcal{A}$  is the action space,  $r : \mathcal{S} \times \mathcal{A} \rightarrow \mathbb{R}$  is the reward function,  $0 \leq \gamma < 1$  is the discount factor,  $\mu$  is the distribution of the initial state, and  $T : \mathcal{S} \times \mathcal{A} \rightarrow \mathcal{S}$  is the deterministic dynamics model. Let  $\Delta(\mathcal{X})$  denote the family of distributions over a set  $\mathcal{X}$ . The expected discounted total reward of a policy  $\pi : \mathcal{S} \rightarrow \Delta(\mathcal{A})$  is defined as

$$J(\pi) = \mathbb{E} \left[ \sum_{i=0}^{\infty} \gamma^i r(s_i, a_i) \right],$$

where  $s_0 \sim \mu, a_i \sim \pi(s_i), s_{i+1} = T(s_i, a_i)$  for  $i \geq 0$ . The goal is to find a policy  $\pi$  which maximizes  $J(\pi)$ .

Let  $\mathcal{S}_{\text{unsafe}} \subset \mathcal{S}$  be the set of unsafe states specified by the user. The user-specified safe set  $\mathcal{S}_{\text{safe}}$  is defined as  $\mathcal{S} \setminus \mathcal{S}_{\text{unsafe}}$ . A state  $s$  is (user-specified) safe if  $s \in \mathcal{S}_{\text{safe}}$ . A trajectory is safe if and only if all the states in the trajectory are safe. An initial state drawn from  $\mu$  is assumed to be safe with probability 1. We say a deterministic policy  $\pi$  is safe starting from state  $s$ , if the infinite-horizon trajectory obtained by executing  $\pi$  starting from  $s$  is safe. We also say a policy  $\pi$  is safe if it is safe starting from an

79 initial state drawn from  $\mu$  with probability 1. A major challenge toward safe RL is the existence of  
 80 irrecoverable states which are currently safe but will eventually lead to unsafe states regardless of  
 81 future actions. We define the notion formally as follows.

82 **Definition 1.** A state  $s$  is viable iff there exists a policy  $\pi$  such that  $\pi$  is safe starting from  $s$ , that is,  
 83 executing  $\pi$  starting from  $s$  for infinite steps never leads to an unsafe state. A user-specified safe state  
 84 that is not viable is called an irrecoverable state.

85 We remark that unlike Srinivasan et al. [2020], Roderick et al. [2020], we do not assume all safe  
 86 states are viable. We rely on the extrapolation and calibration of the dynamics to foresee risks. A  
 87 calibrated dynamics model  $\hat{T}$  predicts a confidence region of states  $\hat{T}(s, a) \subseteq \mathcal{S}$ , such that for any  
 88 state  $s$  and action  $a$ , we have  $T(s, a) \in \hat{T}(s, a)$ .

## 89 2.2 Preliminaries on Barrier Certificate

90 Barrier certificates are powerful tools to certify the stability of a dynamical system. Barrier certificates  
 91 are often applied to a continuous-time dynamical system, but here we describe its discrete-time version  
 92 where our work is based upon. We refer the readers to Prajna and Jadbabaie [2004], Prajna and  
 93 Rantzer [2005] for more information about continuous-time barrier certificates.

94 Given a discrete-time dynamical system  $s_{t+1} = f(s_t)$  without control starting from  $s_0$ , a function  
 95  $h : \mathcal{S} \rightarrow \mathbb{R}$  is a barrier certificate if for any  $s \in \mathcal{S}$  such that  $h(s) \geq 0$ ,  $h(f(s)) \geq 0$ . Zeng et al.  
 96 [2020] considers a more restrictive requirement: For any state  $s \in \mathcal{S}$ ,  $h(f(s)) \geq \alpha h(s)$  for a constant  
 97  $0 \leq \alpha < 1$ .

98 it is easy to use a barrier certificate  $h$  to show the stability of the dynamical system. Let  $\mathcal{C}_h =$   
 99  $\{s : h(s) \geq 0\}$  be the superlevel set of  $h$ . The requirement of barrier certificates directly translates  
 100 to the requirement that if  $s \in \mathcal{C}_h$ , then  $f(s) \in \mathcal{C}_h$ . This property of  $\mathcal{C}_h$ , which is known as the  
 101 *forward-invariant* property, is especially useful in safety-critical settings: suppose a barrier certificate  
 102  $h$  such that  $\mathcal{C}_h$  does not contain unsafe states and contains the initial state  $s_0$ , then it is guaranteed  
 103 that  $\mathcal{C}_h$  contains the entire trajectory of states  $\{s_t\}_{t \geq 0}$  which are safe.

104 Finding barrier certificates requires a known dynamics  $f$ , which often can only be approximated in  
 105 practice. This issue can be resolved by using a well-calibrated dynamics model  $\hat{f}$ , which predicts  
 106 a confidence interval containing the true output. When a calibrated dynamics model  $\hat{f}$  is used, we  
 107 require that for any  $s \in \mathcal{S}$ ,  $\min_{s' \in \hat{f}(s)} h(s') \geq 0$ .

108 Control barrier functions [Ames et al., 2019] are extensions to barrier certificates in the control setting.  
 109 That is, control barrier functions are often used to *find* an action to meet the safety requirement  
 110 instead of certifying the stability of a closed dynamical system. In this work, we simply use barrier  
 111 certificates because in Section 3, we view the policy and the calibrated dynamics model as a whole  
 112 closed dynamical system whose stability we are going to certify.

## 113 3 Learning Barrier Certificates via Adversarial Training

114 This section describes an algorithm that learns a barrier certificate for a fixed policy  $\pi$  under a  
 115 calibrated dynamics model  $\hat{T}$ . Concretely, to certify a policy  $\pi$  is safe, we aim to learn a (discrete-  
 116 time) barrier certificate  $h$  that satisfies the following three requirements.

117 **R.1.** For  $s_0 \sim \mu$ ,  $h(s_0) \geq 0$  with probability 1.

118 **R.2.** For every  $s \in \mathcal{S}_{\text{unsafe}}$ ,  $h(s) < 0$ .

119 **R.3.** For any  $s$  such that  $h(s) \geq 0$ ,  $\min_{s' \in \hat{T}(s, \pi(s))} h(s') \geq 0$ .

120 Requirement **R.1** and **R.3** guarantee that the policy  $\pi$  will never leave the set  $\mathcal{C}_h = \{s \in \mathcal{S} : h(s) \geq$   
 121  $0\}$  by simple induction. Moreover, **R.2** guarantees that  $\mathcal{C}_h$  only contains safe states and therefore the  
 122 policy never visits unsafe states.

123 In the rest of the section, we aim to design and train such a barrier certificate  $h = h_\phi$  parametrized by  
 124 neural network  $\phi$ .

125  **$h_\phi$  parametrization.** The three requirements for a barrier certificate are challenging to simultane-  
 126 ously enforce with constrained optimization involving neural network parameterization. Instead, we  
 127 will parametrize  $h_\phi$  with **R.1** and **R.2** built-in such that for any  $\phi$ ,  $h_\phi$  always satisfies **R.1** and **R.2**.

128 We assume the initial state  $s_0$  is deterministic (the parameterization can be extended to multiple  
 129 initial states.) To capture the known user-specified safety set, we first handcraft a continuous function  
 130  $\mathcal{B}_{\text{safe}} : \mathcal{S} \rightarrow \mathbb{R}_{\geq 0}$  satisfying  $\mathcal{B}_{\text{safe}}(s) \approx 0$  for typical  $s \in \mathcal{S}_{\text{safe}}$  and  $\mathcal{B}_{\text{safe}}(s) > 1$  for any  $s \in \mathcal{S}_{\text{unsafe}}$ .<sup>1</sup>  
 131 The construction of  $\mathcal{B}_{\text{safe}}$  does not need prior knowledge of irrecoverable states, but only the user-  
 132 specified safety set  $\mathcal{S}_{\text{safe}}$ . To further encode the user-specified safety set into  $h_\phi$ , we choose  $h_\phi$  to  
 133 be of form  $h_\phi(s) = 1 - \text{Softplus}(f_\phi(s) - f_\phi(s_0)) - \mathcal{B}_{\text{safe}}(s)$ , where  $f_\phi$  is a neural network, and  
 134  $\text{Softplus}(x) = \log(1 + e^x)$ .

135 Because  $s_0$  is safe and  $\mathcal{B}_{\text{safe}}(s_0) \approx 0$ ,  $h_\phi(s_0) \approx 1 - \text{Softplus}(0) > 0$ . Therefore  $h_h$  satisfies **R.1**.  
 136 Moreover, for any  $s \in \mathcal{S}_{\text{unsafe}}$ , we have  $h_\phi(s) < 1 - \mathcal{B}_{\text{safe}}(s) < 0$ , so  $h_\phi$  in our parametrization  
 137 satisfies **R.2** by design.

138 **Training barrier certificates.** We now move on to training  $\phi$  to satisfy **R.3**. Let

$$U(s, a, h) := \max_{s' \in \hat{\mathcal{T}}(s, a)} -h(s'). \quad (1)$$

139 Then, **R.3** requires  $U(s, \pi(s), h_\phi) \leq 0$  for any  $s \in \mathcal{C}_{h_\phi}$ . The constraint in **R.3** naturally leads up to  
 140 formulate the problem as a min-max problem. Define our objective function to be

$$C^*(h_\phi, U, \pi) := \max_{s \in \mathcal{C}_{h_\phi}} U(s, \pi(s), h_\phi) = \max_{s \in \mathcal{C}_{h_\phi}, s' \in \hat{\mathcal{T}}(s, \pi(s))} -h(s'), \quad (2)$$

141 and we want to minimize  $C^*$  w.r.t.  $\phi$ :

$$\min_{\phi} C^*(h_\phi, U, \pi) = \min_{\phi} \max_{s \in \mathcal{C}_{h_\phi}, s' \in \hat{\mathcal{T}}(s, \pi(s))} -h(s'), \quad (3)$$

142 Our goal is to ensure the minimum value is less than 0. We use gradient descent to solve the  
 143 optimization problem. We also derive the gradient of  $C^*(L_\phi, U, \pi)$  w.r.t.  $\phi$ :

$$\nabla_{\phi} C^*(h_\phi, U, \pi) = \nabla_{\phi} U(s^*, \pi(s^*), h_\phi) - \frac{\|\nabla_{\phi} U(s^*, \pi(s^*), h_\phi)\|_2}{\|\nabla_{\phi} h_\phi(s^*)\|_2} \nabla_{\phi} h_\phi(s^*), \quad (4)$$

144 where  $s^* := \arg \max_{s: h_\phi(s) \leq 1} U(s, \pi(s), h_\phi)$  and we defer the derivation to Appendix A.

145 **Computing the adversarial  $s^*$ .**

146 Equation (4) requires us to compute  $s^*$  efficiently. Because the maximization problem with respect to  
 147  $s$  is nonconcave, there could be multiple local maxima. In practice, we find that it is more efficient  
 148 and reliable to use multiple local maxima to compute  $\nabla_{\phi} C^*$  and then average the gradient.

149 Solving  $s^*$  is highly non-trivial, as it is a non-concave optimization problem with a constraint  $s \in \mathcal{C}_{h_\phi}$ .  
 150 To deal with the constraint, we introduce a Lagrangian multiplier  $\lambda$  and optimize  $U(s, \pi(s), h_\phi) -$   
 151  $\lambda \mathbb{I}_{s \in \mathcal{C}_{h_\phi}}$  w.r.t.  $s$  without any constraints. However, it is still very time-consuming to solve an  
 152 optimization problem independently at each time. Based on the observation that the parameters of  
 153  $h$  do not change too much by one step of gradient step, we can use the optimal solution from the  
 154 last optimization problem as the initial solution for the next one, which naturally leads to the idea of  
 155 maintaining a set of candidates of  $s^*$ 's during the computation of  $\nabla_{\phi} C^*$ .

156 We use Metropolis-adjusted Langevin algorithm (MALA) to maintain a set of candidates  
 157  $\{s_1, \dots, s_m\}$  which are supposed to sample from  $\exp(\tau(U(s, \pi(s), h_\phi) - \lambda \mathbb{I}_{s \in \mathcal{C}_{h_\phi}}))$  for  $\tau = 30$   
 158 and  $\lambda = 33$ . Here  $\tau$  is the temperature indicating we want to focus on the samples with large  
 159  $U(s, \pi(s), h_\phi)$ . Although the indicator function always have zero gradient, it is still useful in the  
 160 sense that MALA will reject  $s_i \notin \mathcal{C}_{h_\phi}$ . A detailed description of MALA is given in Appendix D.

161 We choose MALA over gradient descent because the maintained candidates are more diverse,  
 162 approximate local maxima. If we use gradient descent to find  $s^*$ , then multiple runs of GD likely  
 163 arrive at the same  $s^*$ , so that we lost the parallelism from simultaneously working with multiple

<sup>1</sup>The function  $\mathcal{B}_{\text{safe}}(s)$  is called a barrier function for the user-specified safe set in the optimization literature. Here we do not use this term to avoid confusion with the barrier certificate.

---

**Algorithm 1** Learning barrier certificate  $h_\phi$  for a policy  $\pi$  w.r.t. a calibrated dynamics model  $\hat{\mathcal{T}}$ .

---

**Require:** Temperature  $\tau$ , Lagrangian multiplier  $\lambda$ , and optionally a regularization function  $\text{Reg}$ .

- 1: Let  $U$  be defined as in Equation (1).
  - 2: Initialize  $m$  candidates of  $s_1, \dots, s_m \in \mathcal{S}$  randomly.
  - 3: **for**  $n$  iterations **do**
  - 4:   **for** every candidate  $s_i$  **do**
  - 5:     sample  $s_i \sim \exp(\tau U(s, \pi(s), h_\phi) - \lambda \mathbb{I}_{s \in \mathcal{C}_h})$  by MALA (Algorithm 5).
  - 6:    $W \leftarrow \{s_i : h_\phi(s_i) \geq 0, i \in [m]\}$ .
  - 7:   Train  $\phi$  to minimize  $C^*(h_\phi, U, \pi) + \text{Reg}(\phi)$  using all candidates in  $W$ .
- 

---

**Algorithm 2** CRABS: Co-trained Barrier Certificate for Safe RL (Details in Section 4)

---

**Require:** An initial safe policy  $\pi_{\text{init}}$ .

- 1: Collected trajectories buffer  $\hat{D} \leftarrow \emptyset$ ;  $\pi \leftarrow \pi_{\text{init}}$ .
  - 2: **for**  $T$  epochs **do**
  - 3:   Invoke Algorithm 3 to safely collect trajectories (using  $\pi$  as the safeguard policy and a noisy version of  $\pi$  as the  $\pi^{\text{expl}}$ ). Add the trajectories to  $\hat{D}$ .
  - 4:   Learn a calibrated dynamics  $\hat{\mathcal{T}}$  with  $\hat{D}$ .
  - 5:   Learn a barrier certificate  $h$  that certifies  $\pi$  w.r.t.  $\hat{\mathcal{T}}$  using Algorithm 1 with regularization.
  - 6:   Optimize policy  $\pi$  (according to the reward), using data in  $\hat{D}$ , with the constraint that  $\pi$  is certified by  $h$ .
- 

164 local maxima. MALA avoids this issue by its intrinsic stochasticity, which can also be controlled by  
 165 adjusting the hyperparameter  $\tau$ .

166 We summarize our algorithm of training barrier certificates in Algorithm 1 (which contains optional  
 167 regularization that will be discussed in Section 4.2). At Line 2, the initialization of  $s_i$ 's is arbitrary, as  
 168 long as they have a sort of stochasticity.

## 169 4 CRABS: Co-trained Barrier Certificate for Safe RL

170 In this section, we present our main algorithm, **Co-trained Barrier Certificate for Safe RL (CRABS)**,  
 171 shown in Algorithm 2, to *iteratively* co-train barrier certificates, policy and dynamics, using the  
 172 algorithm in Section 3. In addition to parametrizing  $h$  by  $\phi$ , we further parametrize the policy  $\pi$  by  $\theta$ ,  
 173 and parametrize calibrated dynamics model  $\hat{\mathcal{T}}$  by  $\omega$ . CRABS alternates between training a barrier  
 174 certificate that certifies the policy  $\pi_\theta$  w.r.t. a calibrated dynamics model  $\hat{\mathcal{T}}_\omega$  (Line 5), collecting data  
 175 safely using the certified policy (Line 3, details in Section 4.1), learning a calibrated dynamics model  
 176 (Line 4, details in Section 4.3), and training a policy with the constraint of staying in the superlevel  
 177 set of the barrier function (Line 6, details in Section 4.4). In the following subsections, we discuss  
 178 how we implement each line in detail.

### 179 4.1 Safe Exploration with Certified Safeguard Policy

180 Safe exploration is challenging be-  
 181 cause it is difficult to detect irrevoc-  
 182 able states. The barrier certificate  
 183 is designed to address this — a pol-  
 184 icy  $\pi$  certified by some  $h$  guarantees  
 185 to stay within  $\mathcal{C}_h$  and therefore can  
 186 be used for collecting data. However,  
 187 we may need more diversity in the  
 188 collected data beyond what can be of-  
 189 fered by the deterministic certified pol-  
 190 icy  $\pi^{\text{safeguard}}$ . Thanks to the contrac-  
 191 tion property **R.3**, we in fact know that any exploration policy  $\pi^{\text{expl}}$  within the superlevel set  $\mathcal{C}_h$   
 192 can be made safe with  $\pi^{\text{safeguard}}$  being a safeguard policy—we can first try actions from  $\pi^{\text{expl}}$  and

---

**Algorithm 3** Safe exploration with safeguard policy  $\pi^{\text{safeguard}}$

---

**Require:** (1) A policy  $\pi^{\text{safeguard}}$  certified by barrier certifi-  
 cate  $h$ , (2) any proposal exploration policy  $\pi^{\text{expl}}$ .

**Require:** A state  $s \in \mathcal{C}_{h_\phi}$ .

- 1: Sample  $n$  actions  $a_1, \dots, a_n$  from  $\pi^{\text{expl}}(s)$ .
  - 2: **if** there exists an  $a_i$  such that  $U(s, a_i, h) \leq 1$  **then**
  - 3:   **return:**  $a_i$
  - 4: **else**
  - 5:   **return:**  $\pi^{\text{safeguard}}(s)$ .
-

see if they stay within the viable subset  $\mathcal{C}_h$ , and if none does, invoke the safeguard policy  $\pi^{\text{safeguard}}$ . Algorithm 3 describes formally this simple procedure that makes any exploration policy  $\pi^{\text{expl}}$  safe. By a simple induction, one can see that the policy defined in Algorithm 3 maintains that all the visited states lie in  $\mathcal{C}_h$ .

The safeguard policy  $\pi^{\text{safeguard}}$  is supposed to safeguard the exploration. However, activating the safeguard too often is undesirable, as it only collects data from  $\pi^{\text{safeguard}}$  so there will be little exploration. To mitigate this issue, we often choose  $\pi^{\text{expl}}$  to be a noisy version of  $\pi^{\text{safeguard}}$  so that  $\pi^{\text{expl}}$  will be roughly safe by itself. Moreover, the safeguard policy  $\pi^{\text{safeguard}}$  will be trained via optimizing the reward function as shown in the next subsections. Therefore, a noisy version of  $\pi^{\text{safeguard}}$  will explore the high-reward region and avoid unnecessary exploration.

Following Haarnoja et al. [2018], the policy  $\pi_\theta$  is parametrized as  $\tanh(\mu_\theta(s))$ , and the proposal exploration policy  $\pi_\theta^{\text{expl}}$  is parametrized as  $\tanh(\mu_\theta(s) + \sigma_\theta(s)\zeta)$  for  $\zeta \sim \mathcal{N}(0, I)$ , where  $\mu_\theta$  and  $\sigma_\theta$  are two neural networks. Here the  $\tanh$  is applied to squash the outputs to the action set  $[-1, 1]$ .

## 4.2 Regularizing Barrier Certificates

The quality of exploration is directly related to the quality of policy optimization. In our case, the exploration is only within the learned viable set  $\mathcal{C}_{h_\phi}$  and it will be hindered if  $\mathcal{C}_{h_\phi}$  is too small or does not grow during training. To ensure a large and growing viable subset  $\mathcal{C}_{h_\phi}$ , we encourage the volume of  $\mathcal{C}_{h_\phi}$  to be large by adding a regularization term

$$\text{Reg}(\phi; \hat{h}) = \mathbb{E}_{s \in \mathcal{S}}[\text{relu}(\hat{h}(s) - h_\phi(s))],$$

Here  $\hat{h}$  is the barrier certificate obtained in the previous epoch. In the ideal case when  $\text{Reg}(\phi; \hat{h}) = 0$ , we have  $\mathcal{C}_{h_\phi} \supset \mathcal{C}_{\hat{h}}$ , that is, the new viable subset  $\mathcal{C}_{h_\phi}$  is at least bigger than the reference set (which is the viable subset in the previous epoch.) We compute the expectation over  $\mathcal{S}$  approximately by using the set of candidate  $s$ 's maintained by MALA.

In summary, to learn  $h_\phi$  in CRABS, we minimize the following objective (for a small positive constant  $\lambda$ ) over  $\phi$  as shown in Algorithm 1:

$$\mathcal{L}(\phi; U, \pi_\theta, \hat{h}) = C^*(L_\phi, U, \pi_\theta) + \lambda \text{Reg}(\phi; \hat{h}). \quad (5)$$

We remark that the regularization is not the only reason why the viable set  $\mathcal{C}_{h_\phi}$  can grow. When the dynamics becomes more accurate as we collect more data, the  $\mathcal{C}_{h_\phi}$  will also grow. This is because an inaccurate dynamics will typically make the  $\mathcal{C}_{h_\phi}$  smaller—it is harder to satisfy **R.3** when the confidence region  $\hat{\mathcal{T}}(s, \pi(s))$  in the constraint contains many possible states. Vice versa, shrinking the size of the confidence region will make it easier to certify more states.

## 4.3 Learning a Calibrated Dynamics Model

It is a challenging open question to obtain a dynamics model  $\hat{\mathcal{T}}$  (or any supervised learning model) that is theoretically well-calibrated especially with domain shift [Zhao et al., 2020]. In practice, we heuristically approximate a calibrated dynamics model by learning an ensemble of probabilistic dynamics models, following common practice in RL [Yu et al., 2020, Janner et al., 2019, Chua et al., 2018]. We learn  $K$  probabilistic dynamics models  $f_{\omega_1}, \dots, f_{\omega_K}$  using the data in the replay buffer  $\hat{D}$ . (Interestingly, prior work shows that an ensemble of probabilistic models can still capture the error of estimating a deterministic ground-truth dynamics [Janner et al., 2019, Chua et al., 2018].) Each probabilistic dynamics model  $f_{\omega_i}$  outputs a Gaussian distribution  $\mathcal{N}(\mu_{\omega_i}(s, a), \text{diag}(\sigma_{\omega_i}^2(s, a)))$  with diagonal covariances, where  $\mu_{\omega_i}$  and  $\sigma_{\omega_i}$  are parameterized by neural networks. Given a replay buffer  $\hat{D}$ , the objective for a probabilistic dynamics model  $f_{\omega_i}$  is to minimize the negative log-likelihood:

$$\mathcal{L}_{\hat{\mathcal{T}}}(\omega_i) = -\mathbb{E}_{(s, a, s') \sim \hat{D}} [-\log f_{\omega_i}(s' | s, a)]. \quad (6)$$

The only difference in the training procedure of these probabilistic models is the randomness in the initialization and mini-batches. We simply aggregate the means of all learn dynamics models as a coarse approximation of the confidence region, i.e.,  $\hat{\mathcal{T}}(s, a) = \{\mu_{\omega_i}(s, a)\}_{i \in [K]}$ .

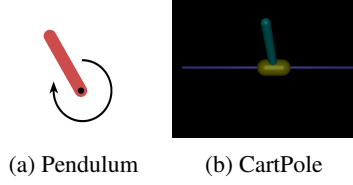

Figure 1: Illustration of environments. The left figure illustrates the Pendulum environment, which is used by *Upright* and *Tilt* tasks. The right figure illustrates the CartPole environment, which is used by *Move* and *Swing* tasks.

#### 4.4 Policy Optimization

We describe our policy optimization algorithm in Algorithm 4. The desiderata here are (1) the policy needs certified by the current barrier certificate  $h$  and (2) the policy has as high reward as possible. We break down our policy optimization algorithm into two components: First, we optimize the total rewards  $J(\pi_\theta)$  of the policy  $\pi_\theta$ ; Second, we use adversarial training to guarantee the optimized policy can be certified by  $h_\phi$ . The modification of SAC is to some extent non-essential and mostly for technical convenience of making SAC somewhat compatible with the constraint set. Instead, it is the adversarial step that fundamentally guarantees that the policy is certified by the current  $h_\phi$ .

**Adversarial training.** We use adversarial training to guarantee  $\pi_\theta$  can be certified by  $h_\phi$ . Similar to what we’ve done in training  $h_\phi$  adversarially, the objective for training  $\pi_\theta$  is to minimize  $C^*(h_\phi, U, \pi_\theta)$ . Unlike the case of  $\phi$ , the gradient of  $C^*(h_\phi, U, \pi_\theta)$  w.r.t.  $\theta$  is simply  $\nabla_\theta U(s^*, \pi_\theta(s^*), h_\phi)$ , as the constraint  $h_\phi(s)$  is unrelated to  $\pi_\theta$ . We also use MALA to solve  $s^*$  and plug it into the gradient term  $\nabla_\theta U(s^*, \pi_\theta(s^*), h_\phi)$ .

**Optimizing  $J(\pi_\theta)$ .** We use a modified SAC [Haarnoja et al., 2018] to optimize  $J(\pi_\theta)$ . As the modification is for safety concerns and is minor, we defer it to Appendix B. As a side note, although we only optimize  $\pi_\theta^{\text{expl}}$  here,  $\pi_\theta$  is also optimized implicitly because  $\pi_\theta^{\text{expl}}$  simply outputs the mean of  $\pi_\theta$  deterministically.

### 5 High-risk, High-reward Environments

We design four tasks, three of which are high-risk, high-reward tasks, to check the efficacy of our algorithm. Even though they are all based on inverted pendulum or cart pole, we choose the reward function to be somewhat conflicted with the safety constraints. That is, the optimal policy needs to take a trajectory that is near the safety boundary. This makes the tasks particularly challenging and suitable for stress testing our algorithm’s capability of avoiding irrecoverable states.

These tasks have state dimension dimensions between 2 to 4. We focus on the relatively low dimensional environments to avoid conflating the failure to learn accurate dynamics models from data and the failure to provide safety given a learned approximate dynamics. Indeed, we identify that the major difficulty to scale up to high-dimensional environments is that it requires significantly more data to learn a decent high-dimensional dynamics that can predict long-horizon trajectories. We remark that we aim to have zero violations. This is very difficult to achieve, even if the environment is low dimensional. As shown by Section 6, many existing algorithms fail to do so.

(a) *Upright*. The task is based on Pendulum-v0 in Open AI Gym [Brockman et al., 2016], as shown in Figure 1a. The agent can apply torque to control a pole. The environment involves the crucial quantity: the tilt angle  $\theta$  which is defined to be the angle between the pole and a vertical line. The safety requirement is that the pole does not fall below the horizontal line. Technically, the user-specified safety set is  $\{\theta : |\theta| \leq \theta_{\max} = 1.5\}$  (note that the threshold is very close to  $\frac{\pi}{2}$  which corresponds to  $90^\circ$ .) The reward function  $r$  is  $r(s, a) = -\theta^2$ , so the optimal policy minimizes the angle and angular speed by keeping the pole upright. The horizon is 200 and the initial state  $s_0 = (0.3, -0.9)$ .

(b) *Tilt*. This action set, dynamics, and horizon, and safety set are the same as in *Upright*. The reward function is different:  $r(s, a) = -(\theta_{\text{limit}} - \theta)^2$ . The optimal policy is supposed to stay tilting near the angle  $\theta = \theta_{\text{limit}}$  where  $\theta_{\text{limit}} = -0.41151684$  is the largest angle the pendulum can stay balanced. The challenge is during exploration, it is easy for the pole to overshoot and violate the safety constraints.

(c) *Move*. The task is based on a cart pole and the goal is to move a cart (the yellow block) to control the pole (with color teal), as shown in Figure 1b. The cart has an  $x$  position between  $-1$  and  $1$ , and the pole also has an angle  $\theta \in [-\frac{\pi}{2}, \frac{\pi}{2}]$  with the same meaning as *Upright* and *Tilt*. The starting position is  $x = \theta = 0$ . We design the reward function to be  $r(s, a) = x^2$ . The user-specified safety set is  $\{(x, \theta) : |\theta| \leq \theta_{\max} = 0.2, |x| \leq 0.9\}$  where  $0.2$  corresponds to roughly  $11^\circ$ . Therefore, the optimal policy needs to move the cart and the pole slowly in one direction, preventing the pole from falling down and the cart from going too far. The horizon is set to 1000.

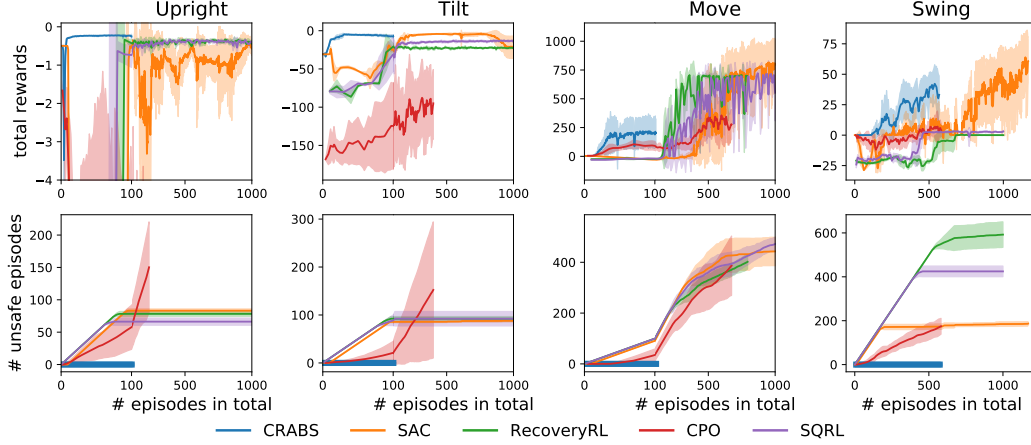

Figure 2: Comparison between CRABS and baselines. CRABS can learn a policy without any safety violations, while other baselines have a lot of safety violations. We run each algorithm four times with independent randomness. The solid curves indicate the mean of four runs and the shaded areas indicate one standard deviation around the mean.

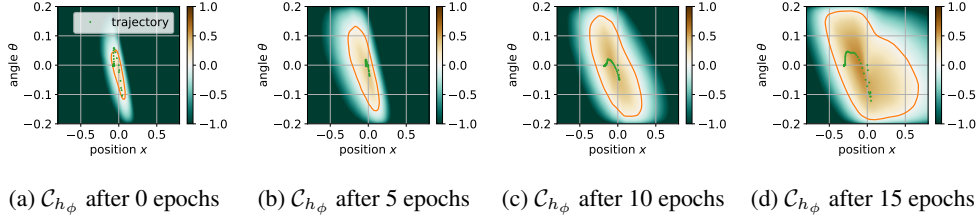

Figure 3: Visualization of the growing viable subsets learned by CRABS in *Move*. To illustrate the 4-dimensional state space, we project a state from  $[x, \theta, \dot{x}, \dot{\theta}]$  to  $[x, \theta]$ . The red curve encloses superlevel set  $C_{h_\phi}$ , while the green points indicate the projected trajectory of the current safe policy. We can also observe that policy  $\pi$  learns to move left as required by the task. We note that shown states in the trajectory sometimes seemingly are not be enclosed by the red curve due to the projection.

(d) **Swing**. This task is similar to *Move*, except for a few differences: The reward function is  $r(s, a) = \theta^2$ ; The user-specified safety set is  $\{(x, \theta) : |\theta| \leq \theta_{\max} = 1.5, |x| \leq 0.9\}$ . So the optimal policy will swing back and forth to some degree and needs to control the angles well so that it does not violate the safety requirement.

For all the tasks, once the safety constraint is violated, the episode will terminate immediately and the agent will receive a reward of -30 as a penalty. The number -30 is tuned by running SAC and choosing the one that SAC performs best with.

## 6 Experimental Results

In this section, we conduct experiments to answer the following question: Can CRABS learn a reasonable policy without safety violations in the designed tasks?

**Baselines.** We compare our algorithm CRABS against four baselines: (a) **Soft Actor-Critic (SAC)** [Haarnoja et al., 2018], one of the state-of-the-art RL algorithms, (b) **Constrained Policy Optimization (CPO)** [Achiam et al., 2017], a safe RL algorithm which builds a trust-region around the current policy and optimizes the policy in the trust-region, (c) **RecoveryRL** [Thananjeyan et al., 2021] which leverages offline data to pretrain a risk-sensitive  $Q$  function and also utilize two policies to achieving two goals (being safe and obtaining high rewards), and (d) **SQRL** [Srinivasan et al., 2020] which leverages offline data in an easier environment and fine-tunes the policy in a more difficult environment. SAC and CPO are given an initial safe policy for safe exploration, while RecoveryRL and SQRL are given offline data containing 40K steps from both mixed safe and unsafe trajectories which are free and are not counted. CRABS collects more data at each iteration in *Swing* than in other tasks to learn a better dynamics model  $\hat{\mathcal{T}}$ . For SAC, we use the default hyperparameters because we found they are not sensitive. For RecoveryRL and SQRL, the hyperparameters are tuned in the



same way as in Thananjeyan et al. [2021]. For CPO, we tune the step size and batch size. More details of experiment setup and the implementation of baselines can be found in Appendix C.

**Results.** Our main results are shown in Figure 2. From the perspective of total rewards, SAC achieves the best total rewards among all of the 5 algorithms in *Move* and *Swing*. In all tasks, CRABS can achieve reasonable total rewards and learns faster at the beginning of training, and we hypothesize that this is directly due to its strong safety enforcement. RecoveryRL and SQRL learn faster than SAC in *Move*, but they suffer in *Swing*. RecoveryRL and SQRL are not capable of learning in *Swing*, although we observed the average return during exploration at the late stages of training can be as high as 15. CPO is quite sample-inefficient and does not achieve reasonable total rewards as well.

From the perspective of safety violations, CRABS surpasses all baselines **without a single safety violation**. The baseline algorithms always suffer from many safety violations. SAC, SQRL, and RecoveryRL have a similar number of unsafe trajectories in *Upright*, *Tilt*, *Move*, while in *Swing*, SAC has the fewest violations and RecoveryRL has the most violations. CPO has a lot of safety violations. We observe that for some random seeds, CPO does find a safe policy and once the policy is trained well, the safety violations become much less frequent, but for other random seeds, CPO keeps visiting unsafe trajectories before it reaches its computation budget.

**Visualization of learned viable subset  $\mathcal{C}_{h_\phi}$ .** We visualized the viable set  $\mathcal{C}_{h_\phi}$  in Figure 3. As shown in the figure, our algorithm CRABS succeeds in certifying more and more viable states and does not get stuck locally, which demonstrates the efficacy of the regularization at Section 4.2.

**Handcrafted barrier function  $h$ .** To demonstrate the advantage of learning a barrier function, we also conduct experiments on a variant of CRABS, which uses a handcrafted barrier certificate by ourselves and does not train it, that is, Algorithm 2 without Line 5. The results show that this variant does not perform well: It does not achieve high rewards, and has many safety violations. We hypothesize that the policy optimization is often burdened by adversarial training, and the safeguard policy sometimes cannot find an action to stay within the superlevel set  $\mathcal{C}_h$ .

## 7 Related Work

Prior works about Safe RL take very different approaches. Dalal et al. [2018] adds an additional layer, which corrects the output of the policy locally. Some of them use Lagrangian methods to solve CMDP, while the Lagrangian multiplier is controlled adaptively [Tessler et al., 2018] or by a PID [Stooke et al., 2020]. Achiam et al. [2017], Yang et al. [2020] build a trust-region around the current policy. Eysenbach et al. [2017] learns a reset policy so that the policy only explores the states that can go back to the initial state. Turchetta et al. [2020] introduces a learnable teacher, which keeps the student safe and helps the student learn faster in a curriculum manner. Srinivasan et al. [2020] pre-trains a policy in a simpler environment and fine-tunes it in a more difficult environment. Bharadhwaj et al. [2020] learns conservative safety critics which underestimate how safe the policy is, and uses the conservative safety critics for safe exploration and policy optimization. Thananjeyan et al. [2021] makes use of existing offline data and co-trains a recovery policy.

Another line of work involves Lyapunov functions and barrier functions. Donti et al. [2020] constructs sets of stabilizing actions using a Lyapunov function, and project the action to the set, while Chow et al. [2019] projects action or parameters to ensure the decrease of Lyapunov function after a step. Ohnishi et al. [2019] is similar to ours but it constructs a barrier function manually instead of learning such one. Ames et al. [2019] gives an excellent overview of control barrier functions and how to design them. Perhaps the most related work to ours is Cheng et al. [2019], which also uses a barrier function to safeguard exploration and uses a reinforcement learning algorithm to learn a policy. However, the key difference is that we *learn* a barrier function, while Cheng et al. [2019] handcrafts one. The works on Lyapunov functions [Berkenkamp et al., 2017, Richards et al., 2018] require the discretizing the state space and thus only work for low-dimensional space.

## 8 Conclusion

In this paper, we propose a novel algorithm CRABS for training-time safe RL. The key idea is that we co-train a barrier certificate together with the policy to certify viable states, and only explore in the learned viable subset. The empirical results show that CRABS can learn some tasks without a single safety violation. We consider using model-based policy optimization techniques to improve the total rewards and sample efficiency as a promising future work. Another fascinating direction is how to deal with less accurate learned dynamics model in higher dimension environments.

## References

- Joshua Achiam, David Held, Aviv Tamar, and Pieter Abbeel. Constrained policy optimization. In *International Conference on Machine Learning*, pages 22–31. PMLR, 2017.
- Ilge Akkaya, Marcin Andrychowicz, Maciek Chociej, Mateusz Litwin, Bob McGrew, Arthur Petron, Alex Paino, Matthias Plappert, Glenn Powell, Raphael Ribas, et al. Solving rubik’s cube with a robot hand. *arXiv preprint arXiv:1910.07113*, 2019.
- Aaron D Ames, Samuel Coogan, Magnus Egerstedt, Gennaro Notomista, Koushil Sreenath, and Paulo Tabuada. Control barrier functions: Theory and applications. In *2019 18th European Control Conference (ECC)*, pages 3420–3431. IEEE, 2019.
- Felix Berkenkamp, Matteo Turchetta, Angela P Schoellig, and Andreas Krause. Safe model-based reinforcement learning with stability guarantees. *arXiv preprint arXiv:1705.08551*, 2017.
- Homanga Bharadhwaj, Aviral Kumar, Nicholas Rhinehart, Sergey Levine, Florian Shkurti, and Animesh Garg. Conservative safety critics for exploration. *arXiv preprint arXiv:2010.14497*, 2020.
- Greg Brockman, Vicki Cheung, Ludwig Pettersson, Jonas Schneider, John Schulman, Jie Tang, and Wojciech Zaremba. Openai gym, 2016.
- Richard Cheng, Gábor Orosz, Richard M Murray, and Joel W Burdick. End-to-end safe reinforcement learning through barrier functions for safety-critical continuous control tasks. In *Proceedings of the AAAI Conference on Artificial Intelligence*, volume 33, pages 3387–3395, 2019.
- Yinlam Chow, Ofir Nachum, Aleksandra Faust, Edgar Duenez-Guzman, and Mohammad Ghavamzadeh. Lyapunov-based safe policy optimization for continuous control. *arXiv preprint arXiv:1901.10031*, 2019.
- Kurtland Chua, Roberto Calandra, Rowan McAllister, and Sergey Levine. Deep reinforcement learning in a handful of trials using probabilistic dynamics models. *arXiv preprint arXiv:1805.12114*, 2018.
- Gal Dalal, Krishnamurthy Dvijotham, Matej Vecerik, Todd Hester, Cosmin Paduraru, and Yuval Tassa. Safe exploration in continuous action spaces. *arXiv preprint arXiv:1801.08757*, 2018.
- Kefan Dong, Yuping Luo, Tianhe Yu, Chelsea Finn, and Tengyu Ma. On the expressivity of neural networks for deep reinforcement learning. In *International Conference on Machine Learning*, pages 2627–2637. PMLR, 2020.
- Priya L Donti, Melrose Roderick, Mahyar Fazlyab, and J Zico Kolter. Enforcing robust control guarantees within neural network policies. *arXiv preprint arXiv:2011.08105*, 2020.
- Benjamin Eysenbach, Shixiang Gu, Julian Ibarz, and Sergey Levine. Leave no trace: Learning to reset for safe and autonomous reinforcement learning. *arXiv preprint arXiv:1711.06782*, 2017.
- Scott Fujimoto, Herke Hoof, and David Meger. Addressing function approximation error in actor-critic methods. In *International Conference on Machine Learning*, pages 1587–1596. PMLR, 2018.
- Tuomas Haarnoja, Aurick Zhou, Kristian Hartikainen, George Tucker, Sehoon Ha, Jie Tan, Vikash Kumar, Henry Zhu, Abhishek Gupta, Pieter Abbeel, et al. Soft actor-critic algorithms and applications. *arXiv preprint arXiv:1812.05905*, 2018.
- Michael Janner, Justin Fu, Marvin Zhang, and Sergey Levine. When to trust your model: Model-based policy optimization. *arXiv preprint arXiv:1906.08253*, 2019.
- Diederik P Kingma and Jimmy Ba. Adam: A method for stochastic optimization. *arXiv preprint arXiv:1412.6980*, 2014.
- Yuping Luo, Huazhe Xu, Yuanzhi Li, Yuandong Tian, Trevor Darrell, and Tengyu Ma. Algorithmic framework for model-based deep reinforcement learning with theoretical guarantees. In *International Conference on Learning Representations*, 2019. URL <https://openreview.net/forum?id=BJe1E2R5KX>.

Volodymyr Mnih, Koray Kavukcuoglu, David Silver, Andrei A Rusu, Joel Veness, Marc G Bellemare, Alex Graves, Martin Riedmiller, Andreas K Fidjeland, Georg Ostrovski, et al. Human-level control through deep reinforcement learning. *nature*, 518(7540):529–533, 2015.

Quan Nguyen and Koushil Sreenath. Exponential control barrier functions for enforcing high relative-degree safety-critical constraints. In *2016 American Control Conference (ACC)*, pages 322–328. IEEE, 2016.

Motoya Ohnishi, Li Wang, Gennaro Notomista, and Magnus Egerstedt. Barrier-certified adaptive reinforcement learning with applications to brushbot navigation. *IEEE Transactions on robotics*, 35(5):1186–1205, 2019.

Adam Paszke, Sam Gross, Francisco Massa, Adam Lerer, James Bradbury, Gregory Chanan, Trevor Killeen, Zeming Lin, Natalia Gimelshein, Luca Antiga, Alban Desmaison, Andreas Kopf, Edward Yang, Zachary DeVito, Martin Raison, Alykhan Tejani, Sasank Chilamkurthy, Benoit Steiner, Lu Fang, Junjie Bai, and Soumith Chintala. Pytorch: An imperative style, high-performance deep learning library. In H. Wallach, H. Larochelle, A. Beygelzimer, F. dAlché Buc, E. Fox, and R. Garnett, editors, *Advances in Neural Information Processing Systems 32*, pages 8024–8035. Curran Associates, Inc., 2019. URL <http://papers.neurips.cc/paper/9015-pytorch-an-imperative-style-high-performance-deep-learning-library.pdf>.

Stephen Prajna and Ali Jadbabaie. Safety verification of hybrid systems using barrier certificates. In *International Workshop on Hybrid Systems: Computation and Control*, pages 477–492. Springer, 2004.

Stephen Prajna and Anders Rantzer. On the necessity of barrier certificates. *IFAC Proceedings Volumes*, 38(1):526–531, 2005.

Prajit Ramachandran, Barret Zoph, and Quoc V Le. Searching for activation functions. *arXiv preprint arXiv:1710.05941*, 2017.

Spencer M. Richards, Felix Berkenkamp, and Andreas Krause. The lyapunov neural network: Adaptive stability certification for safe learning of dynamical systems, 2018.

Melrose Roderick, Vaishnavh Nagarajan, and J Zico Kolter. Provably safe pac-mdp exploration using analogies. *arXiv preprint arXiv:2007.03574*, 2020.

David Silver, Julian Schrittwieser, Karen Simonyan, Ioannis Antonoglou, Aja Huang, Arthur Guez, Thomas Hubert, Lucas Baker, Matthew Lai, Adrian Bolton, et al. Mastering the game of go without human knowledge. *nature*, 550(7676):354–359, 2017.

Krishnan Srinivasan, Benjamin Eysenbach, Sehoon Ha, Jie Tan, and Chelsea Finn. Learning to be safe: Deep rl with a safety critic. *arXiv preprint arXiv:2010.14603*, 2020.

Adam Stooke, Joshua Achiam, and Pieter Abbeel. Responsive safety in reinforcement learning by pid lagrangian methods. In *International Conference on Machine Learning*, pages 9133–9143. PMLR, 2020.

Andrew J Taylor, Victor D Dorobantu, Hoang M Le, Yisong Yue, and Aaron D Ames. Episodic learning with control lyapunov functions for uncertain robotic systems. In *2019 IEEE/RSJ International Conference on Intelligent Robots and Systems (IROS)*, pages 6878–6884. IEEE, 2019.

Chen Tessler, Daniel J Mankowitz, and Shie Mannor. Reward constrained policy optimization. *arXiv preprint arXiv:1805.11074*, 2018.

Brijen Thananjeyan, Ashwin Balakrishna, Suraj Nair, Michael Luo, Krishnan Srinivasan, Minh Hwang, Joseph E Gonzalez, Julian Ibarz, Chelsea Finn, and Ken Goldberg. Recovery rl: Safe reinforcement learning with learned recovery zones. *IEEE Robotics and Automation Letters*, 6(3):4915–4922, 2021.

- 450 Emanuel Todorov, Tom Erez, and Yuval Tassa. Mujoco: A physics engine for model-based control.  
 451 In *2012 IEEE/RSJ International Conference on Intelligent Robots and Systems*, pages 5026–5033.  
 452 IEEE, 2012.
- 453 Matteo Turchetta, Andrey Kolobov, Shital Shah, Andreas Krause, and Alekh Agarwal. Safe rein-  
 454 forcement learning via curriculum induction. *arXiv preprint arXiv:2006.12136*, 2020.
- 455 Tsung-Yen Yang, Justinian Rosca, Karthik Narasimhan, and Peter J Ramadge. Accelerating safe  
 456 reinforcement learning with constraint-mismatched policies. *arXiv preprint arXiv:2006.11645*,  
 457 2020.
- 458 Tianhe Yu, Garrett Thomas, Lantao Yu, Stefano Ermon, James Zou, Sergey Levine, Chelsea Finn, and  
 459 Tengyu Ma. Mopo: Model-based offline policy optimization. *arXiv preprint arXiv:2005.13239*,  
 460 2020.
- 461 Jun Zeng, Bike Zhang, and Koushil Sreenath. Safety-critical model predictive control with discrete-  
 462 time control barrier function. *arXiv preprint arXiv:2007.11718*, 2020.
- 463 Shengjia Zhao, Tengyu Ma, and Stefano Ermon. Individual calibration with randomized forecasting.  
 464 *arXiv preprint arXiv:2006.10288*, 2020.

## 465 Checklist

- 466 1. For all authors...
- 467 (a) Do the main claims made in the abstract and introduction accurately reflect the paper’s  
 468 contributions and scope? [\[Yes\]](#)
- 469 (b) Did you describe the limitations of your work? [\[Yes\]](#) In Appendix E.
- 470 (c) Did you discuss any potential negative societal impacts of your work? [\[Yes\]](#) In  
 471 Appendix F.
- 472 (d) Have you read the ethics review guidelines and ensured that your paper conforms to  
 473 them? [\[Yes\]](#)
- 474 2. If you are including theoretical results...
- 475 (a) Did you state the full set of assumptions of all theoretical results? [\[N/A\]](#)
- 476 (b) Did you include complete proofs of all theoretical results? [\[N/A\]](#)
- 477 3. If you ran experiments...
- 478 (a) Did you include the code, data, and instructions needed to reproduce the main experi-  
 479 mental results (either in the supplemental material or as a URL)? [\[Yes\]](#)
- 480 (b) Did you specify all the training details (e.g., data splits, hyperparameters, how they  
 481 were chosen)? [\[Yes\]](#) In Appendix C.
- 482 (c) Did you report error bars (e.g., with respect to the random seed after running experi-  
 483 ments multiple times)? [\[Yes\]](#)
- 484 (d) Did you include the total amount of compute and the type of resources used (e.g., type  
 485 of GPUs, internal cluster, or cloud provider)? [\[Yes\]](#) In Appendix C.
- 486 4. If you are using existing assets (e.g., code, data, models) or curating/releasing new assets...
- 487 (a) If your work uses existing assets, did you cite the creators? [\[N/A\]](#)
- 488 (b) Did you mention the license of the assets? [\[N/A\]](#)
- 489 (c) Did you include any new assets either in the supplemental material or as a URL? [\[N/A\]](#)
- 490
- 491 (d) Did you discuss whether and how consent was obtained from people whose data you’re  
 492 using/curating? [\[N/A\]](#)
- 493 (e) Did you discuss whether the data you are using/curating contains personally identifiable  
 494 information or offensive content? [\[N/A\]](#)
- 495 5. If you used crowdsourcing or conducted research with human subjects...
- 496 (a) Did you include the full text of instructions given to participants and screenshots, if  
 497 applicable? [\[N/A\]](#)

- 498 (b) Did you describe any potential participant risks, with links to Institutional Review  
499 Board (IRB) approvals, if applicable? [N/A]  
500 (c) Did you include the estimated hourly wage paid to participants and the total amount  
501 spent on participant compensation? [N/A]

## 502 A Gradient of $C^*(h_\phi, U, \pi)$

503 Recall the definition of  $C^*$  is

$$C^*(h_\phi, U, \pi) := \max_{s: h_\phi(s) \leq 1} U(s, \pi(s), h_\phi),$$

504 The tricky part about optimizing  $C^*$  is that both the constraint and  $U$  function depend on the parameter  
505  $\phi$ , so the gradient of  $C^*$  is not merely just the gradient of  $U$  evaluated at the maximizer of  $U$  w.r.t  $s$ .

506 We first prove a more general lemma (Lemma 1). The gradient of  $C^*(h_\phi, U, \pi)$  w.r.t.  $\phi$  can be  
507 directly computed using Lemma 1.

508 **Lemma 1.** *Let  $f, g : \mathbb{R}^n \times \mathbb{R}^m \rightarrow \mathbb{R}$  be two differentiable functions. For any  $y \in \mathbb{R}^m$ , define*  
509  *$x^* = \arg \max_{x: g(x, y) \leq 0} f(x, y)$  and  $f^* = f(x^*, y)$ . The gradient of  $f^*(y)$  w.r.t.  $y$  is given by:*

$$\nabla_y f^*(y) = \nabla_y f(x, y)|_{x^*} - \frac{\|\nabla_x f(x, y)|_{x^*}\|_2}{\|\nabla_x g(x, y)|_{x^*}\|_2} \nabla_y g(x, y)|_{x^*}.$$

510

*Proof.* Let  $L(x, y, \lambda) = f(x, y) - \lambda g(x, y)$  be the Lagrangian. For a suitable choice of  $\lambda$ , we have

$$f^*(y) = \min_x L(x, y, \lambda) = \min_x f(x, y) - \lambda g(x, y).$$

511 In this way, we remove the constraint from  $x$ , so

$$\begin{aligned} \nabla_y f^*(y) &= \nabla_y [\min_x f(x, y) - \lambda g(x, y)] \\ &= \nabla_y f(x, y)|_{x^*} - g(x^*, y) \nabla_y \lambda - \lambda \nabla_y g(x, y)|_{x^*}. \end{aligned} \quad (7)$$

512 Now we're going to simplify the second term  $g(x^*, y) \nabla_y \lambda$ . In the case  $g(x^*, y) = 0$ ,  $g(x^*, y) \nabla_y \lambda$   
513 is definitely 0. In the case  $g(x^*, y) \neq 0$ ,  $x^*$  is in the interior of the feasible set  $\{x : g(x, y) \leq 0\}$ . By  
514 KKT condition,  $\lambda = 0$ . To analyze  $\nabla_y \lambda$  in this case, we consider a neighbor  $y + \Delta y$  of  $y$ . When  
515  $\|\Delta y\|$  is small enough,  $x^*$  is still in the feasible set  $\{x : g(x, y + \Delta y) \leq 0\}$  so  $\lambda$  does not change,  
516 which means  $\nabla_y \lambda = 0$ . In both cases, we have  $g(x^*, y) \nabla_y \lambda = 0$ . Therefore we can simplify (7):

$$\nabla_y f^*(y) = \nabla_y f(x, y)|_{x^*} - \lambda \nabla_y g(x, y)|_{x^*}. \quad (8)$$

517 Once again by KKT condition:

$$\nabla_x f(x, y)|_{x^*} - \lambda \nabla_x g(x, y)|_{x^*} = 0,$$

518 so

$$\lambda = \frac{\|\nabla_x f(x, y)|_{x^*}\|_2}{\|\nabla_x g(x, y)|_{x^*}\|_2}, \quad (9)$$

519 The last step is simply plugging (9) into (8).  $\square$

## 520 B Reward Optimizing in CRABS

521 As in original SAC, we maintain two  $Q$  functions  $Q_{\psi_i}$  and their target networks  $Q_{\bar{\psi}_i}$  for  $i \in \{1, 2\}$ ,  
522 together with a learnable temperature  $\alpha$ . The objective for the policy is to minimize

$$\mathcal{L}_\pi(\theta) = \mathbb{E}_{s \sim \hat{D}, a \sim \pi_\theta} \left[ \alpha \log \pi_\theta^{\text{expl}}(a|s) - \hat{Q}_{\psi_1}(s, a) \right], \quad (10)$$

523 where  $\hat{Q}_{\psi_1}(s, a) = Q_{\psi_1}(s, a)$  if  $U(s, a, h) \leq 0$ , otherwise  $\hat{Q}_{\psi_1}(s, a) = -C - U(s, a, h)$  for a large  
524 enough constant  $C$ . The heuristics behind the design of  $\hat{Q}_{\psi_1}$  is that we should lower the probability  
525 of  $\pi_\theta^{\text{expl}}$  proposing an action which will possibly leave the superlevel set  $\mathcal{C}_{h_\phi}$  to reduce the frequency  
526 of invoking the safeguard policy during exploration.

527 The temporal difference objective for the  $Q$  function is

$$\mathcal{L}_Q(\psi_i) = \mathbb{E}_{(s, a, r, s') \sim \hat{D}} \mathbb{E}_{a' \sim \pi_\theta^{\text{expl}}(s')} \left[ (Q_{\psi_i}(s, a) - (r + \gamma \min_{i \in \{1, 2\}} Q_{\bar{\psi}_i}(s, a)))^2 \mathbb{I}_{U(s', a', h_\phi) \leq 0} \right], \quad (11)$$

528 We remark that we reject all  $a' \sim \pi_\theta^{\text{expl}}(s')$  such that  $U(s', a', h_\phi) > 0$ , as our safe exploration  
529 algorithm (Algorithm 3) will reject all of them eventually. The temperature  $\alpha$  is learned the same as  
530 in Haarnoja et al. [2018]:

$$\mathcal{L}_\alpha(\alpha) = \mathbb{E}_{s \sim \hat{D}} [-\alpha \log \pi_\theta^{\text{expl}}(a|s) - \alpha \bar{\mathcal{H}}], \quad (12)$$

531 where  $\bar{\mathcal{H}}$  is hyperparameter, indicating the target entropy of the policy  $\pi_\theta^{\text{expl}}$ .

---

**Algorithm 4** Modified SAC to train a policy while constraining it to stay within  $\mathcal{C}_{h_\phi}$ 

---

**input** A policy  $\pi$ , the replay buffer  $\widehat{D}$   
1: Sample a batch  $\mathcal{B}$  from buffer  $\widehat{D}$ .  
2: Train  $\theta$  to minimize  $\mathcal{L}_\pi(\theta)$  using  $\mathcal{B}$ .  
3: Train  $Q$  to minimize  $\mathcal{L}_Q(\psi_i)$  for  $i \in \{1, 2\}$  using  $\mathcal{B}$ .  
4: Train  $\alpha$  to minimize  $\mathcal{L}_\alpha(\alpha)$  using  $\mathcal{B}$ .  
5: Invoke MALA to training  $s^*$  adversarially (as in L4-5 in Algorithm 1).  
6: Train  $\theta$  minimize  $C^*(h_\phi, U, \pi_\theta)$ .  
7: Update target network  $\bar{\psi}_i$  for  $i \in \{1, 2\}$ .

---

## C Experiment Details

Our code is implemented by Pytorch [Paszke et al., 2019] and runs in a single RTX-2080 GPU. Typically it takes 12 hours to run one seed for *Upright*, *Tilt* and *Move*, and for *Swing* it takes around 60 hours.

### C.1 Environment

All the environments are based on OpenAI Gym [Brockman et al., 2016] where MuJoCo [Todorov et al., 2012] serves as the underlying physics engine. We use discount  $\gamma = 0.99$ .

The tasks *Upright* and *Tilt* are based on Pendulum-v0. The observation is  $[\theta, \dot{\theta}]$  where  $\theta$  is the angle between the pole and a vertical line, and  $\dot{\theta}$  is the angular velocity. The agent can apply a torque to the pendulum. The task *Move* and *Swing* is based on InvertedPendulum-v2 with observation  $[x, \theta, \dot{x}, \dot{\theta}]$ . The agent can control how the cart moves.

As all of the constraints are in the form of  $\|\theta\| \leq \theta_{\max}$  and  $|x| \leq x_{\max}$ . For each type of constraint, we design  $\mathcal{B}_{\text{safe}}$  to be

$$\mathcal{B}_{\text{safe}}(s) = \max(\omega(\theta/\theta_{\max}), \omega(x/x_{\max})),$$

with  $\omega(x) = \max(0, 100(|x| - 1))$ . If there is no constraint of  $x$ , we just take  $\mathcal{B}_{\text{safe}}(s) = \omega(\theta/\theta_{\max})$ . One can easily check that  $\mathcal{B}_{\text{safe}}(s)$  is continuous and equals to 1 at the boundary of safety set.

### C.2 Hyperparameters

**Policy** We parametrize our policy using a feed-forward neural network with ReLU activation and two hidden layers, each of which contains 256 hidden units. Similar to Haarnoja et al. [2018], the output of the policy is squashed by a tanh function.

The initial policy is obtained by running SAC for  $10^5$  steps, checking the intermediate policy for every  $10^4$  steps and picking the first safe intermediate policy.

In all tasks, we optimize the policy for 2000 steps in a single epoch.

**Dynamics Model** We use an ensemble of five learned dynamics models as the calibrated dynamics model. Each of the dynamics model contains 4 hidden layers with 400 hidden units and use Swish as the activation function [Ramachandran et al., 2017]. Following Chua et al. [2018], we also train learnable parameters to bound the output of  $\sigma_\omega$ . We use Adam [Kingma and Ba, 2014] with learning rate 0.001, weight decay 0.000075 and batch size 256 to optimize the dynamics model.

In the experiment *Move* and *Swing*, the initial model is obtained by training one a data for 20000 steps with 500 safe trajectories, obtained by adding different noises to the initial safe policy.

At each epoch, we optimize the dynamics models for 1000 steps.

**Barrier certificate  $h$**  The barrier certificate is parametrized by a feed-forward neural network with ReLU activation and two hidden layers, each of which contains 256 hidden units. The coefficient  $\lambda$  in Equation (5) is set to 0.001.

565 **Collecting data.** In *Upright*, *Tilt* and *Move*, the Line 3 in Algorithm 2 collects a single episode. In  
 566 *Swing*, the Line 3 collects six episodes, two of which are from Algorithm 3 with a uniform random  
 567 policy, another two are from the current policy, and the remaining two are from the current policy  
 568 but with more noises. In Algorithm 3, we first draw  $n = 100$  Gaussian samples  $\zeta_i \sim \mathcal{N}(0, I)$ , and  
 569 the sampled actions are  $a_i = \tanh(\mu_\theta(s) + \zeta_i \sigma_\theta(s))$ , where  $\sigma_\theta(s)$  and  $\mu_\theta(s)$  are the outputs of the  
 570 exploration policy  $\pi^{\text{expl}}$ .

### 571 C.3 Baselines

572 **RecoveryRL** We use the code in <https://github.com/abalakrishna123/recovery-rl>. We  
 573 remark that when running experiments in Recovery RL, we do not add the violation penalty for an  
 574 unsafe trajectory. We set  $\epsilon_{\text{risk}} = 0.5$  (chosen from  $[0.1, 0.3, 0.7, 0.7]$ ) and discount factor  $\gamma_{\text{risk}} = 0.6$   
 575 (chosen from  $[0.8, 0.7, 0.6, 0.5]$ ). The offline dataset  $\mathcal{D}_{\text{offline}}$ , which is used to pretrain the  $Q_{\text{risk}}^\pi$ ,  
 576 contains 20K transitions from a random policy and another 20K transitions from the initial (safe)  
 577 policy used by CRABS. The violations in the offline dataset is **not** counted when plotting.

578 Unfortunately, with chosen hyperparameters, we do not observe reasonable high reward from the  
 579 policy, but we do observe that after around 400 episodes, RecoveryRL visits high reward (15-20)  
 580 region in the *Swing* task and there are few violations since then.

581 **SAC** We implement SAC ourselves with learned temperature  $\alpha$ , which we hypothesize is the reason  
 582 of it superior performance over RecoveryRL and SQRL. The violation penalty is chosen to be 30  
 583 from  $[3, 10, 30, 100]$  by tuning in the *Swing* and *Move* task. We found out that with violation penalty  
 584 being 100, SAC has slightly fewer violations (around 167), but the total reward can be quite low ( $< 2$ )  
 585 after  $10^6$  samples, so we choose to show the result of violation penalty being 30.

586 **SQRL** We use code provided by RecoveryRL with the same offline data and hyperparameters.  
 587 However, we found out that the  $\nu$  parameter (that is, the Lagrangian multiplier) is very important and  
 588 tune it by choosing the optimal one from  $[3, 10, 30, 100, 300]$  in *Swing*. The optimal  $\nu$  is the same as  
 589 that for SAC, which is 30. As SQRL and RecoveryRL use a fixed temperature for SAC, we find it  
 590 suboptimal in some cases, e.g., for *Swing*.

591 **CPO** We use the code in <https://github.com/jachiam/cpo>. To make CPO more sample  
 592 efficient and easier to compare, we reduce the batch size from 50000 to 5000 (for *Move* and *Tilt*) or  
 593 1000 (for *Tilt* and *Upright*). We tune the step size in  $[0.02, 0.05, 0.005]$  but do not find substantial  
 594 difference, while tuning the batch size can significantly reduce its sample efficiency, although it is  
 595 still sample-inefficient.

### 596 D Metropolis-Adjusted Langevin Algorithm (MALA)

Given a probability density function  $p$  on  $\mathbb{R}^d$ , Metropolis-Adjusted Langevin Algorithm (MALA)  
 obtains random samples  $x \sim p$  when direct sampling is difficult. it is based on Metropolis-Hastings  
 algorithm which generates a sequence of samples  $\{x_t\}_t$ . Metropolis-Hastings algorithm requires a  
*proposal distribution*  $q(x'|x)$ . At step  $t \geq 0$ , Metropolis-Hastings algorithm generates a new sample  
 $\hat{x}_{t+1} \sim q(\cdot|x_t)$  and accept it with probability

$$\alpha(x \rightarrow x') = \min \left( 1, \frac{p(x')q(x|x')}{p(x)q(x'|x)} \right).$$

597 If the sample  $\hat{x}_{t+1}$  is accepted, we set  $x_{t+1} = \hat{x}_{t+1}$ ; Otherwise the old sample  $x_t$  is used:  $x_{t+1} = x_t$ .  
 598 MALA considers a special proposal function  $q_\tau(x'|x) = \mathcal{N}(x + \tau \nabla p(x), 2\tau I_d)$ . See Algorithm 5  
 599 for the pseudocode.

For our purpose, as we seek to compute  $C^*(h_\phi, U, \pi_\theta)$ , we maintain  $m = 10^4$  sequences of samples  
 $\{\{s_t^{(i)}\}_t\}_{i \in [m]}$ . Recall that  $C^*$  involves a constrained optimization problem:

$$C^*(h_\phi, U, \pi_\theta) := \max_{s: h_\phi(s) \leq 1} U(s, \pi_\theta(s), h_\phi),$$

600 so for each  $i \in [m]$ , the sequence  $\{s_t^{(i)}\}_t$  follows the Algorithm 5 to sample  $s \sim$   
 601  $\exp(\lambda_1 U(s, \pi_\theta(s), h_\phi) - \lambda_2 \mathbb{I}_{s \in \mathcal{C}_h})$  with  $\lambda_1 = 30, \lambda_2 = 1000$ . The step size  $\tau$  is chosen such



---

**Algorithm 5** Metropolis-Adjusted Langevin Algorithm (MALA)

---

**Require:** A probability density function  $p$  and a step size  $\tau$ .

```
1: Initialize  $x_0$  arbitrarily.  
2: for  $t$  from 0 to  $\infty$  do  
3:   Draw  $\zeta_t \sim \mathcal{N}(0, I_d)$ .  
4:   Set  $\hat{x}_{t+1} = x_t + \tau \nabla \log p(X_t) + \sqrt{2\tau} \zeta_t$ .  
5:   Draw  $u_t \sim \text{Uniform}[0, 1]$ .  
6:   if  $u_t \geq \alpha(x_t \rightarrow \hat{x}_{t+1})$  then  
7:     Set  $x_{t+1} = \hat{x}_{t+1}$ .  
8:   else  
9:     Set  $x_{t+1} = x_t$ .
```

---

602 that the acceptance rate is approximately 0.6. In practice, when  $s_t^{(i)} \notin \mathcal{C}_h$ , we do not use MALA, but  
603 use gradient descent to project it back to the set  $\mathcal{C}_h$ .

## 604 E Limitations

- 605 • Our work relies on learning a calibrated dynamics model. However, as we pointed out in  
606 Section 4.3, it is often very difficult to learn a well-calibrated dynamics model. The fact that  
607 our algorithm of training a barrier certificate certifies the safety of a policy for infintion  
608 horizon requires a very well-calibraetd dynamics model. This limitation can be possibly  
609 reduced by leveraging domain knowledge.
- 610 • CRABS has a very slow training speed, mostly due to adversarial training and the use of an  
611 ensemble of dynamics model.
- 612 • CRABS did not find the optimal policy in the sense that the total reward is lower than some  
613 baselines (SAC).
- 614 • We do not guarantee that the Algorithm 1, which learns a barrier certificate for a policy  
615 w.r.t. a calibrated dynamics model, can always succeed, even if the policy is safe in the real  
616 environment.

## 617 F Negative Social Impact

618 Our algorithm aims to achieve zero safety violations, but we only tested our algorithm on simulated  
619 environments. So the algorithm cannot be applied to safety-critical real environments directly without  
620 further testing. If the algorithm is deployed without further testing, there might be undesirable  
621 consequences that have negative social impacts, e.g., the valuable devices might be broken, or when  
622 applied to health care, it might endanger the patients.
